# Supplementary material
Source: publisher figshare collection journal article supplement (https://gsajournals.figshare.com/ndownloader/files/22441523)
Supplement: Supplementary file 1 [file 22441523]

| Strain Number | Gene Symbol | dTDP-43mNLS Aggregation |
| --- | --- | --- |
| BSC-52,888 | *Gle1* | Reduction |
| d06510 | *dco* | Reduction |
| c05668 | *klp98A* | Reduction |
| f03242 | *CG10960* | Reduction |
| d00123 | *trol* | Reduction |
| e00651 | *CG32521* | Reduction |
| e00530 | *adp* | Reduction |
| BSC-31,157 | *Marf* | No Effect |
| c03600 | *sra* | No Effect |
| d10800 | *hdc* | No Effect |
| c03244 | *corto* | No Effect |
| e02126 | *dati* | No Effect |
| e02098 | *CG16890* | No Effect |
| d00510 | *ArfGAP3* | No Effect |
| d03562 | *Hsc70Cb* | No Effect |
| e04545 | *ade* | No Effect |

**Table S3**. **Qualitative modification of 3rd instar larval eye imaginal disc dTDP-43 aggregation**.We assessed the ability of approximately 16 suppressors of *GMR-hTDP-43*M337V and *GMR-hFUS*R521C to qualitatively effect the distribution of dTDP-43mNLS aggregates. *CG10960*f03242, *dco*d06510, *klp98A*c05668, *Gle1*52888, *trol*d00123, *CG32521*e00651 and *adp*e00530 all exhibit reduced dTDP-43mNLS aggregate formation or more diffuse dTDP-43 cytoplasmic staining in this background. Listed are the Exelixis or Bloomington strain (BSC) number, the *Drosophila* gene symbol and the qualitative effect on dTDP-43mNLS cytoplasmic aggregation.
